# Supplementary material for: Worldwide Dissemination of blaKPC Gene by Novel Mobilization Platforms in Pseudomonas aeruginosa: A Systematic Review
Source: MDPI journal article supplement (doi:10.3390/antibiotics12040658), 2023-03-28
Supplement: s1 [file s1]

## Supplementary Materials

**Supplementary Material S1.** Isolates that carry a novel NTE<sub>KPC</sub>.

| NTE <sub>KPC</sub> subtype | Genome location | Strain       | Plasmid name   | Access number | Length (bp) | Country   | Number of <i>bla</i> <sub>KPC</sub> copies | MLST   |
|----------------------------|-----------------|--------------|----------------|---------------|-------------|-----------|--------------------------------------------|--------|
| NTE <sub>KPC</sub> -I      | Plasmid         | R31          | pR31-KPC       | CP061851.1    | 29,402      | China     | Single copy                                | NR     |
|                            | Plasmid         | PA2207       | unnamed        | CP080290      | 41,938      | China     | Single copy                                | ST463  |
|                            | Plasmid         | BH6          | pBH6           | CM003767      | 3,652       | Brazil    | Single copy                                | NR     |
|                            | Plasmid         | Not reported | YLH6_p3        | MK882885.1    | 49,162      | China     | Double copy                                | NR     |
|                            | Plasmid         | P33          | pP33-2         | CP065414.1    | 48,306      | China     | Single copy                                | NR     |
|                            | Plasmid         | C79          | p1             | CP040685      | 40,180      | China     | Single copy                                | NR     |
|                            | Plasmid         | ZYPA         | pZYPA01        | MZ050803.1    | 41,104      | China     | Single copy                                | NR     |
|                            | Chromosome      | NDTH7329     | -              | CP078006.1    | 7,144,260   | China     | Six copies                                 | ST463  |
|                            | Plasmid         | QZPH16       | pQZPH16-KPC    | CP078005.1    | 64,631      | China     | Single copy                                | ST463  |
|                            | Plasmid         | QZPH21       | pQZPH21-KPC    | CP078003.1    | 58,802      | China     | Single copy                                | ST463  |
|                            | Plasmid         | SRRSH1120    | pSRRSH1120-KPC | CP078000.1    | 106,679     | China     | Single copy                                | ST463  |
|                            | Chromosome      | SRRSH1521    | -              | CP077997.1    | 6,594,602   | China     | Single copy                                | ST244  |
|                            | Plasmid         | SRRSH2790    | pSRRSH2790-KPC | CP077995.1    | 62,848      | China     | Single copy                                | ST463  |
|                            | Plasmid         | NDTH10366    | pNDTH10366-KPC | CP064402.1    | 392,244     | China     | Double copy                                | NR     |
|                            | Chromosome      | NDTH10366    | -              | CP064401.1    | 6,974,425   | China     | Three copies                               | ST463  |
|                            | Plasmid         | SRRSH1408    | pSRRSH1408-KPC | CP064396.1    | 44,426      | China     | Single copy                                | ST463  |
|                            | Plasmid         | 1011         | p1011-KPC2     | MH734334.1    | 62,793      | China     | Single copy                                | ST463  |
| NTE <sub>KPC</sub> -II     | Plasmid         | 10265        | p10265-KPC     | KU578314.1    | 38,939      | China     | Single copy                                | NR     |
|                            | Plasmid         | HdC          | unnamed        | OL780449.1    | 42,750      | Argentina | Single copy                                | NR     |
|                            | Plasmid         | FAHZU40      | pFAHZU40-KPC   | CP078008.1    | 28,700      | China     | Single copy                                | ST234  |
|                            | Plasmid         | SE5419       | pSE5419-3      | CP081349.1    | 42,487      | China     | Double copy                                | ST697  |
|                            | Plasmid         | SE5416       | pSE5416-KPC    | MN894887.1    | 510,711     | China     | Single copy                                | ST697  |
|                            | Plasmid         | PA-2         | pPA-2          | KC609322.1    | 7,995       | Colombia  | Single copy                                | ST1006 |
|                            |                 |              |                |               |             |           |                                            |        |

|                         |         |           |                |            |        |        |             |    |
|-------------------------|---------|-----------|----------------|------------|--------|--------|-------------|----|
| NTE <sub>KPC</sub> -III | Plasmid | D5170990  | pD5170990      | KX169264.1 | 32,424 | Brazil | Single copy | NR |
| NTE <sub>KPC</sub> -IV  | Plasmid | CCBH28525 | pCCBH28525_KPC | CP086065.1 | 60,312 | Brazil | Double copy | NR |

**Abbreviations:** MLST, Multi-Locus Sequence Type; NR, Information not founded in the NCBI report nor via PubMLST.

**Supplementary Material S2.** Advanced search strategy for PubMed and Embase databases

| <b>PUBMED</b>                                  |                                                                                                                                                                                                                                                                                                                                                                                                                                                                                                                                                                                                                                                                   |                    |
|------------------------------------------------|-------------------------------------------------------------------------------------------------------------------------------------------------------------------------------------------------------------------------------------------------------------------------------------------------------------------------------------------------------------------------------------------------------------------------------------------------------------------------------------------------------------------------------------------------------------------------------------------------------------------------------------------------------------------|--------------------|
| <i>Search</i>                                  | <i>Query</i>                                                                                                                                                                                                                                                                                                                                                                                                                                                                                                                                                                                                                                                      | <i>Items found</i> |
| <b>#1</b>                                      | (((((Pseudomonas aeruginosa) OR (Bacterium aeruginosum)) OR (Bacillus aeruginosus)))                                                                                                                                                                                                                                                                                                                                                                                                                                                                                                                                                                              | 51,030             |
| <b>#2</b>                                      | ((((((((((((((Carbapenems) OR (carbapenem)) OR (carbapenem antibiotics)) OR (antibiotics, carbapenem)) OR (doripenem)) OR (ertapenem)) OR (invanoz)) OR (invanz)) OR (ertapenem sodium)) OR (imipenem)) OR (imipemide)) OR (meropenem)) OR (merrem)) OR (ronem)) OR (penem)))                                                                                                                                                                                                                                                                                                                                                                                     | 27,454             |
| <b>#3</b>                                      | (((((beta-lactamase KPC-2) OR (beta-lactamase KPC-3)) OR (blaKPC)) OR (bla KPC))) AND (((((((((((dissemination) OR (transposon resolvases)) OR (transposon)) OR (DNA transposable elements)) OR (integrons)) OR (integron)) OR (plasmids)) OR (plasmid)) OR (episomes)) OR (episome))                                                                                                                                                                                                                                                                                                                                                                             | 1,115              |
| <b>Final search<br/>(#1 AND #2<br/>AND #3)</b> | (((((Pseudomonas aeruginosa) OR (Bacterium aeruginosum)) OR (Bacillus aeruginosus)) AND (((((((((((((((Carbapenems) OR (carbapenem)) OR (carbapenem antibiotics)) OR (antibiotics, carbapenem)) OR (doripenem)) OR (ertapenem)) OR (invanoz)) OR (invanz)) OR (ertapenem sodium)) OR (imipenem)) OR (imipemide)) OR (meropenem)) OR (merrem)) OR (ronem)) OR (penem))) AND ((((((beta-lactamase KPC-2) OR (beta-lactamase KPC-3)) OR (blaKPC)) OR (bla KPC))) AND (((((((((((dissemination) OR (transposon resolvases)) OR (transposon)) OR (DNA transposable elements)) OR (integrons)) OR (integron)) OR (plasmids)) OR (plasmid)) OR (episomes)) OR (episome)) | 65                 |

  

| <b>EMBASE</b>                                  |                                                                                                                                                                                                                                                                                                                                                                        |                    |
|------------------------------------------------|------------------------------------------------------------------------------------------------------------------------------------------------------------------------------------------------------------------------------------------------------------------------------------------------------------------------------------------------------------------------|--------------------|
| <i>Search</i>                                  | <i>Query</i>                                                                                                                                                                                                                                                                                                                                                           | <i>Items found</i> |
| <b>#1</b>                                      | 'pseudomonas aeruginosa'/exp/                                                                                                                                                                                                                                                                                                                                          | 93,588             |
| <b>#2</b>                                      | ('carbapenem'/exp OR 'carbapenem' OR 'doripenem'/exp OR 'doribax' OR 'doripenem' OR 'finibax' OR 'ertapenem'/exp OR 'ertapenem' OR 'ertapenem sodium' OR 'invanoz' OR 'invanz' OR 'imipenem'/exp OR 'formiminothienamycin' OR 'imipemide' OR 'imipenem' OR 'meropenem'/exp OR 'mepem' OR 'meronem' OR 'meropen' OR 'meropenem' OR 'merrem' OR 'merrem i.v.')           | 87,342             |
| <b>#3</b>                                      | ('blakpc gene'/exp OR 'blakpc 2 gene'/exp OR 'blakpc 3 gene'/exp OR kpc) AND ('transposon'/exp OR 'tes (transposable elements)' OR 'jumping gene' OR 'transposable element' OR 'transposable elements' OR 'transposon' OR 'dissemination'/exp OR 'integron'/exp OR 'plasmid'/exp OR 'bacterial plasmid' OR 'gene, plasmid' OR 'plasmid' OR nte OR 'gene cassette'/exp) | 1,255              |
| <b>Final search<br/>(#1 AND #2<br/>AND #3)</b> | 'pseudomonas aeruginosa'/exp AND ('carbapenem'/exp OR 'carbapenem' OR 'doripenem'/exp OR 'doribax' OR 'doripenem' OR 'finibax' OR 'ertapenem'/exp OR 'ertapenem' OR 'ertapenem sodium' OR 'invanoz' OR                                                                                                                                                                 | 113                |

'invanz' OR 'imipenem'/exp OR 'formiminothienamycin' OR 'imipemide' OR 'imipenem' OR 'meropenem'/exp OR 'mepem' OR 'meronem' OR 'meropen' OR 'meropenem' OR 'merrem' OR 'merrem i.v.') AND ('blakpc gene'/exp OR 'blakpc 2 gene'/exp OR 'blakpc 3 gene'/exp OR kpc) AND ('transposon'/exp OR 'tes (transposable elements)' OR 'jumping gene' OR 'transposable element' OR 'transposable elements' OR 'transposon' OR 'dissemination'/exp OR 'integron'/exp OR 'plasmid'/exp OR 'bacterial plasmid' OR 'gene, plasmid' OR 'plasmid' OR nte OR 'gene cassette'/exp)

**Supplementary Material S3.** Excluded studies with reason for exclusion.

| First author     | Year | Reason for exclusion                                  |
|------------------|------|-------------------------------------------------------|
| Nordmann         | 2002 | Review article                                        |
| Poirel           | 2002 | Isolates of <i>Pseudomonas aeruginosa</i> without KPC |
| Poirel           | 2002 | Isolates of <i>Pseudomonas aeruginosa</i> without KPC |
| Bedenić          | 2005 | Review article                                        |
| Livermore        | 2006 | Review article                                        |
| LaBombardi       | 2007 | Review article                                        |
| Poirel           | 2007 | Review article                                        |
| Pitout           | 2008 | Review article                                        |
| Goldfarb         | 2009 | Irrelevant pathogen                                   |
| Pfeifer          | 2009 | Non-relevant studies                                  |
| Walsh            | 2009 | Review article                                        |
| Pfeifer          | 2010 | Review article                                        |
| Cuzon            | 2010 | Review article                                        |
| AmbrožičAvguštin | 2010 | Isolates of <i>Pseudomonas aeruginosa</i> without KPC |
| Walsh            | 2010 | Review article                                        |
| Nordmann         | 2010 | Review article                                        |
| Nath             | 2010 | Non-relevant studies                                  |
| Tian             | 2011 | Isolates of <i>Pseudomonas aeruginosa</i> without KPC |
| Hrabák           | 2011 | Irrelevant pathogen                                   |
| Castanheira      | 2011 | Isolates of <i>Pseudomonas aeruginosa</i> without KPC |
| Richter          | 2011 | Isolates of <i>Pseudomonas aeruginosa</i> without KPC |
| Naas             | 2011 | Isolates of <i>Pseudomonas aeruginosa</i> without KPC |
| Jánvári          | 2011 | Irrelevant pathogen                                   |
| Drieux           | 2011 | Isolates of <i>Pseudomonas aeruginosa</i> without KPC |
| Mataseje         | 2012 | Isolates of <i>Pseudomonas aeruginosa</i> without KPC |
| Hong             | 2012 | Isolates of <i>Pseudomonas aeruginosa</i> without KPC |
| Castanheira      | 2012 | Isolates of <i>Pseudomonas aeruginosa</i> without KPC |
| Damjanova        | 2012 | Irrelevant pathogen                                   |

|               |      |                                                       |
|---------------|------|-------------------------------------------------------|
| Castanheira   | 2012 | Isolates of <i>Pseudomonas aeruginosa</i> without KPC |
| Bryant        | 2013 | Isolates of <i>Pseudomonas aeruginosa</i> without KPC |
| Kaase         | 2013 | Isolates of <i>Pseudomonas aeruginosa</i> without KPC |
| Chen          | 2013 | Irrelevant pathogen                                   |
| Liu           | 2014 | Language                                              |
| Martínez      | 2014 | Irrelevant pathogen                                   |
| Zheng         | 2015 | Isolates of <i>Pseudomonas aeruginosa</i> without KPC |
| ND            | 2015 | Review article                                        |
| Khatun        | 2015 | Isolates of <i>Pseudomonas aeruginosa</i> without KPC |
| Ruppé         | 2015 | Review article                                        |
| Sun           | 2016 | Isolates of <i>Pseudomonas aeruginosa</i> without KPC |
| Vanegas       | 2016 | Isolates of <i>Pseudomonas aeruginosa</i> without KPC |
| Martinez      | 2016 | Irrelevant pathogen                                   |
| Nachimuthu    | 2016 | Isolates of <i>Pseudomonas aeruginosa</i> without KPC |
| Rolain        | 2016 | Review article                                        |
| Ng            | 2017 | Non-human study                                       |
| Manohar       | 2017 | Isolates of <i>Pseudomonas aeruginosa</i> without KPC |
| Beyrouthy     | 2017 | Irrelevant pathogen                                   |
| ALI           | 2017 | Non-human study                                       |
| Nascimento    | 2017 | Non-human study                                       |
| Manohar       | 2017 | Isolates of <i>Pseudomonas aeruginosa</i> without KPC |
| Bloemberg     | 2017 | Non-relevant studies                                  |
| Bush          | 2017 | Review article                                        |
| Kocsis B      | 2017 | Review article                                        |
| Mathlouthi    | 2017 | Review article                                        |
| Lamba         | 2017 | Non-human study                                       |
| Khurana       | 2017 | Isolates of <i>Pseudomonas aeruginosa</i> without KPC |
| Jaillard      | 2017 | Non-relevant studies                                  |
| Johnning      | 2018 | Isolates of <i>Pseudomonas aeruginosa</i> without KPC |
| Zowawi        | 2018 | Isolates of <i>Pseudomonas aeruginosa</i> without KPC |
| Castanheira   | 2018 | Non-relevant studies                                  |
| Castanheira   | 2018 | Isolates of <i>Pseudomonas aeruginosa</i> without KPC |
| Singh-Moodley | 2018 | Isolates of <i>Pseudomonas aeruginosa</i> without KPC |
| Wen           | 2018 | Isolates of <i>Pseudomonas aeruginosa</i> without KPC |
| Karampatakis  | 2018 | Review article                                        |
| Alves         | 2018 | Irrelevant pathogen                                   |
| Yoon          | 2018 | Irrelevant pathogen                                   |
| Wyres         | 2018 | Irrelevant pathogen                                   |
| Pournajaf     | 2018 | Non-relevant studies                                  |

|                  |      |                                                       |
|------------------|------|-------------------------------------------------------|
| Gomez-Gamboa     | 2019 | Isolates of <i>Pseudomonas aeruginosa</i> without KPC |
| Mangat           | 2019 | Non-relevant studies                                  |
| Lee              | 2019 | Isolates of <i>Pseudomonas aeruginosa</i> without KPC |
| Ortiz de la Rosa | 2019 | Non-relevant studies                                  |
| Zhu              | 2019 | Isolates of <i>Pseudomonas aeruginosa</i> without KPC |
| Song             | 2019 | Isolates of <i>Pseudomonas aeruginosa</i> without KPC |
| O'Neill          | 2020 | Isolates of <i>Pseudomonas aeruginosa</i> without KPC |
| Silva Júnior     | 2020 | Isolates of <i>Pseudomonas aeruginosa</i> without KPC |
| Beirão           | 2020 | Non-relevant studies                                  |
| Botelho          | 2020 | Non-relevant studies                                  |
| Lima             | 2020 | Irrelevant pathogen                                   |
| Nishida          | 2020 | Irrelevant pathogen                                   |
| AlAmri           | 2020 | Irrelevant pathogen                                   |
| Silva            | 2020 | Isolates of <i>Pseudomonas aeruginosa</i> without KPC |
| Bush             | 2020 | Review article                                        |
| Halat            | 2020 | Review article                                        |
| Pathak           | 2020 | Isolates of <i>Pseudomonas aeruginosa</i> without KPC |
| Ramirez          | 2020 | Isolates of <i>Pseudomonas aeruginosa</i> without KPC |
| Janse            | 2021 | Non-relevant studies                                  |
| Yan              | 2021 | Irrelevant pathogen                                   |
| Yee              | 2021 | Isolates of <i>Pseudomonas aeruginosa</i> without KPC |
| Majlander        | 2021 | Non-human study                                       |
| Al-Zahrani       | 2021 | Isolates of <i>Pseudomonas aeruginosa</i> without KPC |
| Nafplioti        | 2021 | Isolates of <i>Pseudomonas aeruginosa</i> without KPC |
| Sanou            | 2021 | Irrelevant pathogen                                   |
| Borelli          | 2021 | Isolates of <i>Pseudomonas aeruginosa</i> without KPC |
| Dos Santos       | 2021 | Non-human study                                       |
| Janssen          | 2021 | Non-human study                                       |
| Huang            | 2021 | Irrelevant pathogen                                   |
| Nirwan           | 2021 | Irrelevant pathogen                                   |
| Jean             | 2022 | Review article                                        |
| Ayoub Moubareck  | 2022 | Review article                                        |
